# Supplementary material for: Investigation of cytochrome P450-modified cadmium sulfide quantum dots as photocatalysts
Source: Royal Society of Chemistry journal article supplement (doi:10.1039/b805526b), 2008-01-01

Supplementary Material (ESI) for Journal of Materials Chemistry

## **Investigation of cytochrome P450-modified cadmium sulfide quantum dots as photocatalysts**

Valérie J. Gandubert,<sup>a</sup> Eduardo Torres,<sup>b</sup> Christof M. Niemeyer\*<sup>a,c</sup>

<sup>a</sup>Dr. V. J. Gandubert, Prof. Dr. C. M. Niemeyer

Technische Universität Dortmund, Fakultät für Chemie

Biologisch-Chemische Mikrostrukturtechnik

Otto-Hahn Strasse 6, 44227 Dortmund (Germany)

Fax: (+49)231-755-7082

E-mail: christof.niemeyer@tu-dortmund.de

<sup>b</sup>Dr. E. Torres

Present address: Universidad Autónoma Metropolitana- Cuajimalpa

Depto. Procesos y Tecnología

México, D. F. 01120 (Mexico)

<sup>c</sup> Prof. Dr. C. M. Niemeyer

ISAS-Institute for Analytical Sciences

Bunsen-Kirchoff-Strasse 11, 44139 Dortmund (Germany)

## TEM micrograph of mercaptoacetic acid functionalized CdS quantum dots and statistical analysis of the QDs diameter

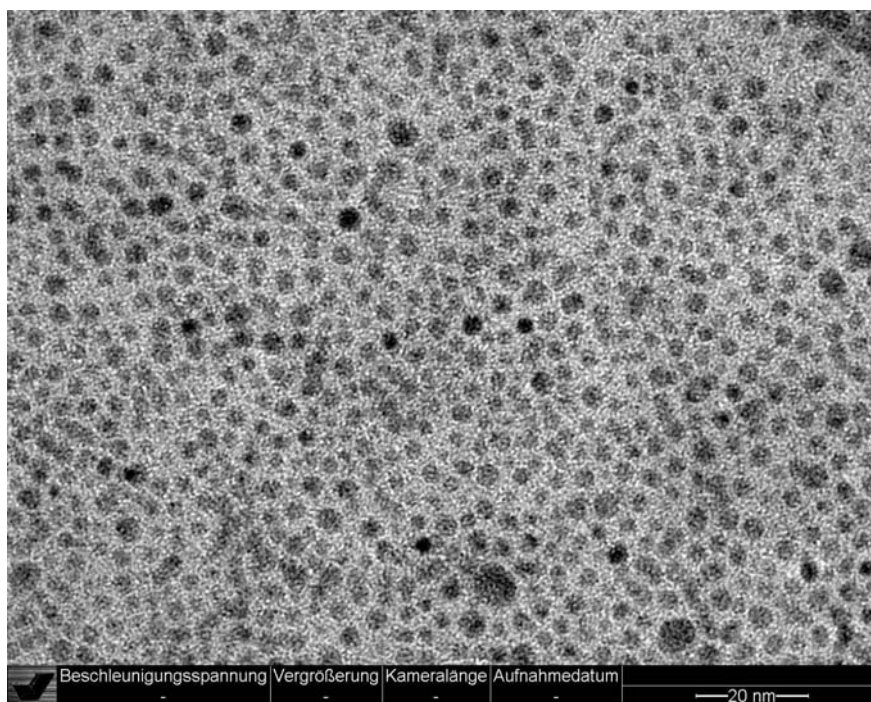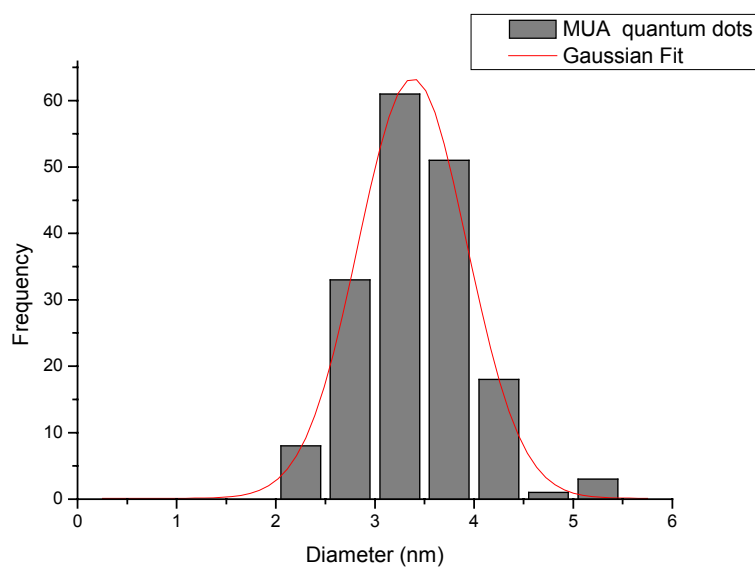

The QDs have a diameter of  $3.4 \pm 0.6$  nm ( 175 QDs measured)

## Absorption spectra of reduced CYP152A1 before and after bubbling carbon monoxide

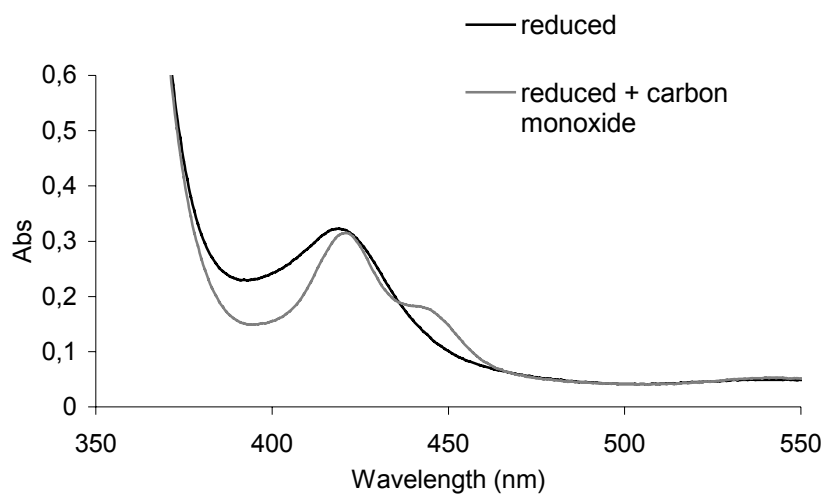

## Light-switchable activity of the nano hybrids containing 10nM CYP152A1 and a QD: CYP152A1 ratio of 200:1

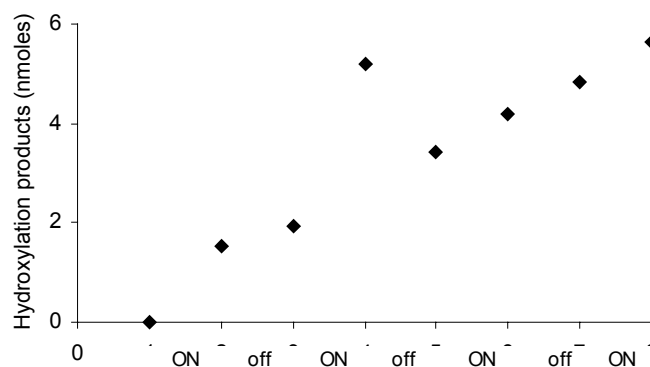

Supplement: b805526b.pdf [file b805526b.pdf]
